# Supplementary material
Source: MDPI journal article supplement (https://www.mdpi.com/2077-0472/13/7/1330)
Supplement: s1 [file s1]

Supplementary Materials

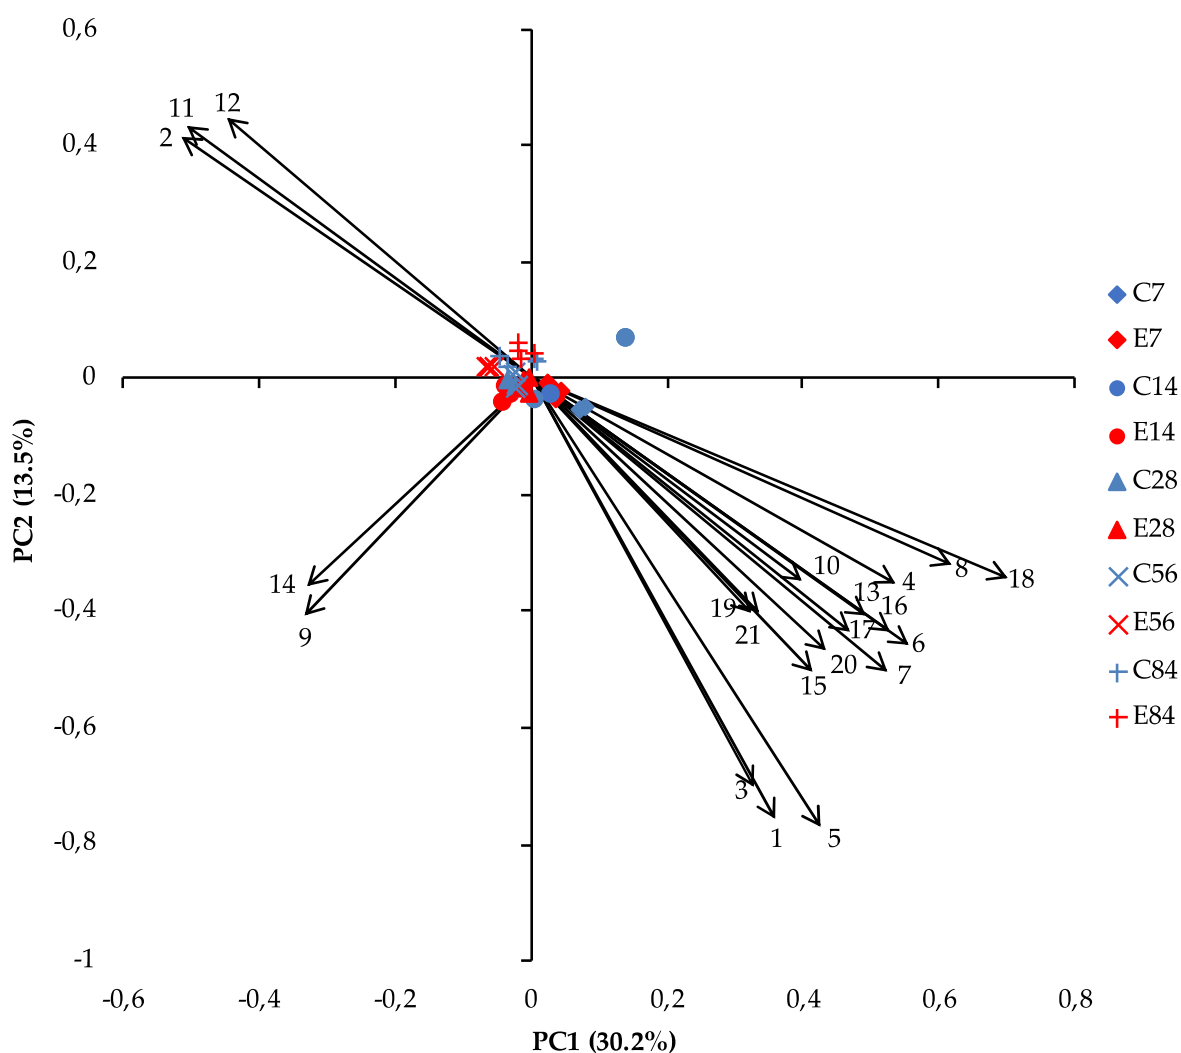

**Figure S1.** PCoA by UniFrac weighted distance matrix. Arrows indicate significant correlations at the level of bacterial families: 1 – Sphingomonadaceae, 2 - Vicinamibacterales\_uncultured, 3 – Oxalobacteraceae, 4 – Acetobacteraceae, 5 – Xanthomonadaceae, 6 – Beijerinckiaceae, 7 – Rhizobiaceae, 8 – Streptomyetaceae, 9 - WPS-2\_fa, 10 - Nocardiaceae, 11 - Planctomyce-tota\_OM190\_fa, 12 - Vicinamibacteria\_Subgroup\_17\_fa, 13 – Pseudomonadaceae, 14 - Xanthomonadales\_unclassified, 15 - Ktedonobacteria\_B12-WMSP1\_fa, 16 – Bacillaceae, 17 – Weeksel-laceae, 18 – Micrococcaceae, 19 – Herpetosiphonaceae, 20 – Phormidiaceae, 21 – Pleomorpho-monadaceae.

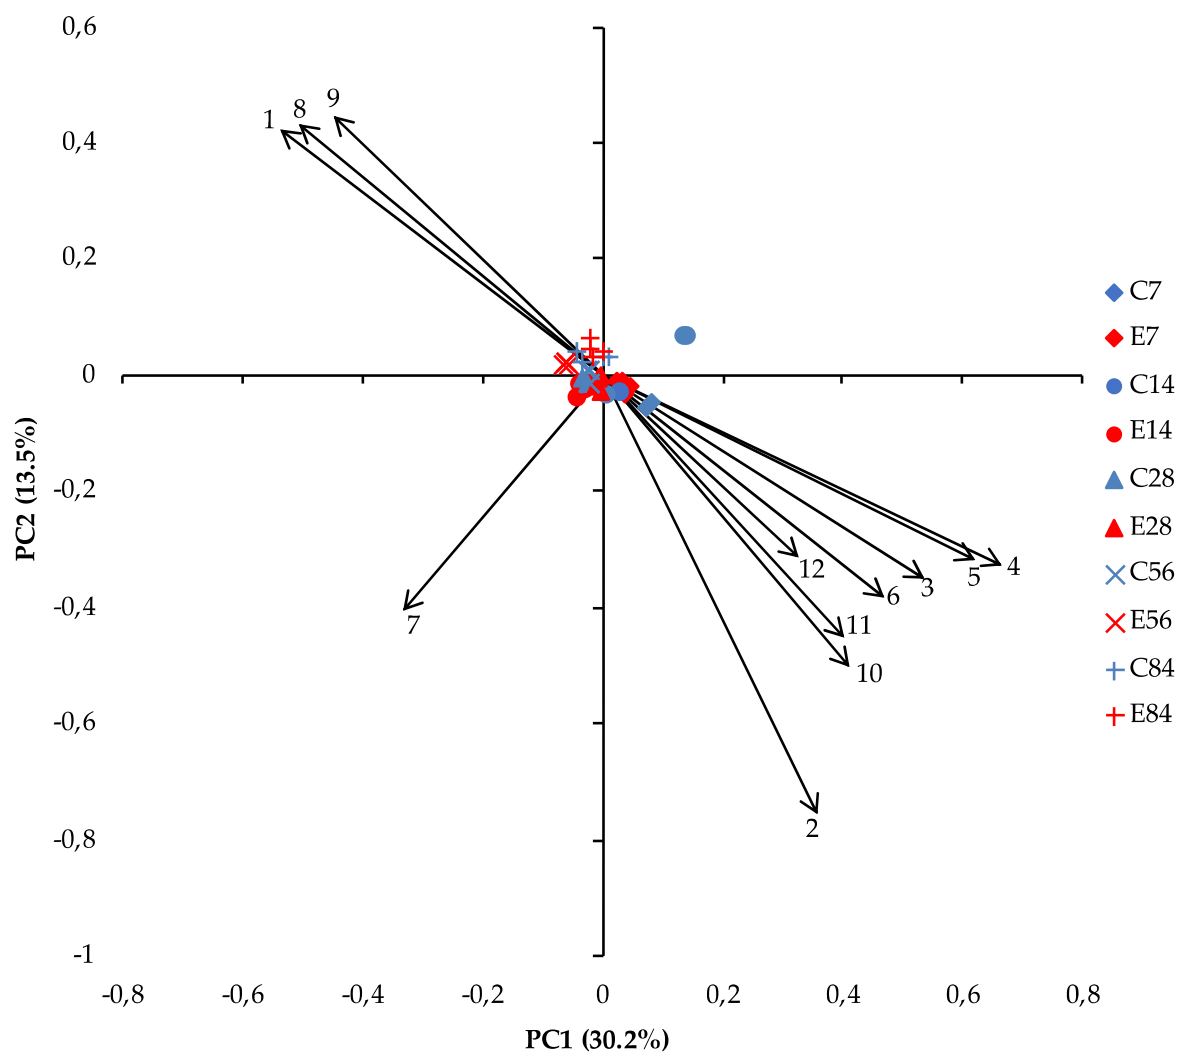

**Figure S2.** PCoA by UniFrac weighted distance matrix. Arrows indicate significant correlations at the level of orders: 1 – Vicinamibacterales, 2 – Sphingomonadales, 3 – Acetobacterales, 4 – Bacillales, 5 – Streptomycetales, 6 – Pseudomonadales, 7 – WPS-2\_order, 8 – Planctomycetota\_OM190\_order, 9 – Vicinamibacteria\_Subgroup\_17, 10 – Ktedonobacteria\_B12-WMSP1, 11 – Cyanobacterales, 12 – Saccharimonadales.

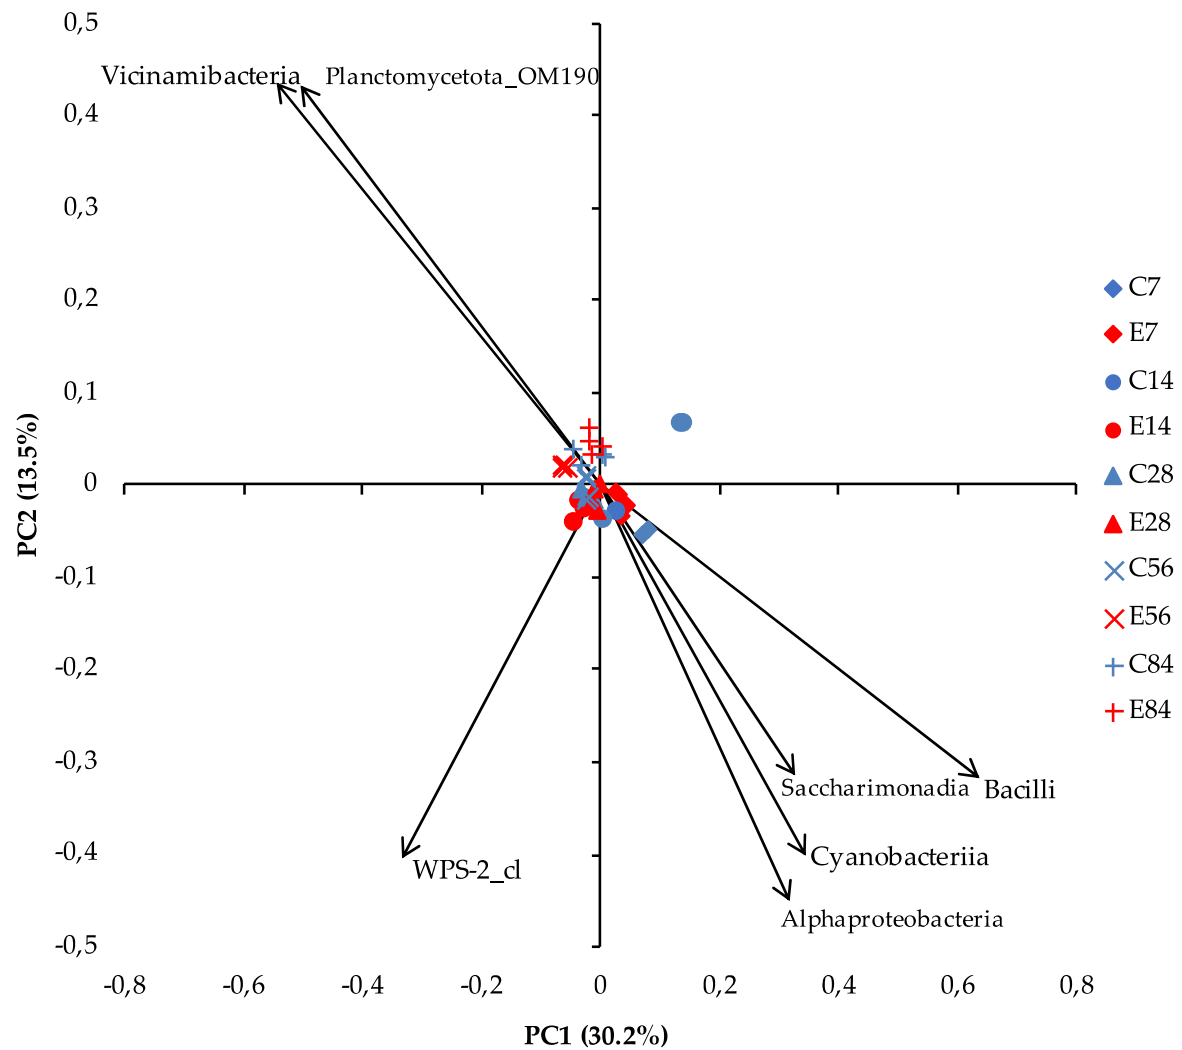

**Figure S3.** PCoA by UniFrac weighted distance matrix. Arrows indicate significant correlations at the class level.

**Table S1.** AMOVA analysis of bacterial communities.

| Groups  | Source of variation | SS       | df | MS       | Fs      | p-value |
|---------|---------------------|----------|----|----------|---------|---------|
| C7-E7   | Among groups        | 0.023401 | 1  | 0.023401 | 4.10145 | 0.0229  |
|         | Within groups       | 0.034233 | 6  | 0.005705 |         |         |
| C84-E84 | Among groups        | 0.018644 | 1  | 0.018644 | 2.15226 | 0.0292  |
|         | Within groups       | 0.051974 | 6  | 0.008662 |         |         |
| C7-C84  | Among groups        | 0.121267 | 1  | 0.121267 | 17.8917 | 0.028   |
|         | Within groups       | 0.040667 | 6  | 0.006778 |         |         |
| E7-E84  | Among groups        | 0.074539 | 1  | 0.074539 | 9.82068 | 0.0232  |
|         | Within groups       | 0.04554  | 6  | 0.00759  |         |         |

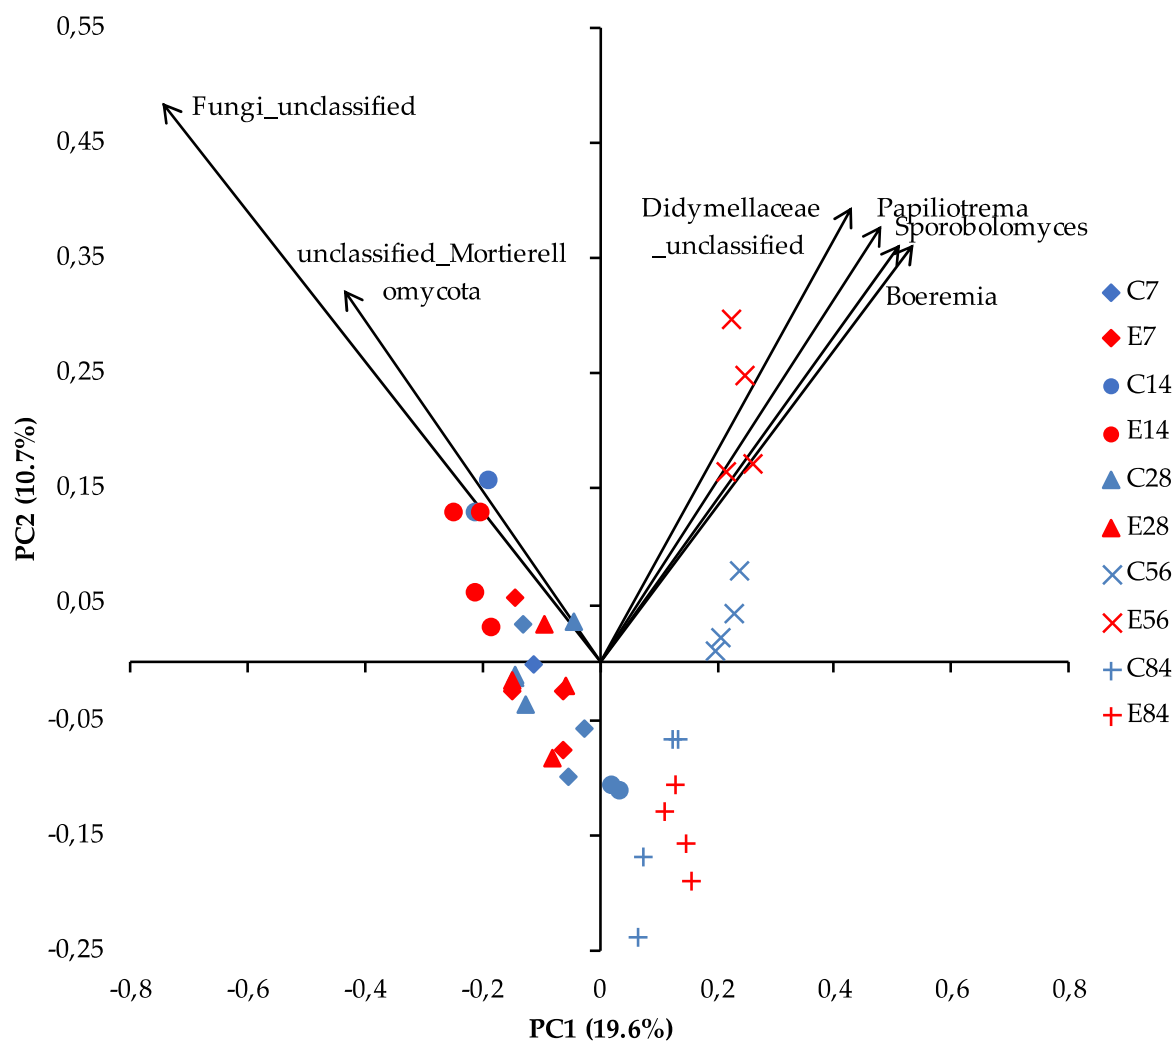

**Figure S4.** PCoA by UniFrac weighted distance matrix. Arrows indicate significant correlations at the genera level.

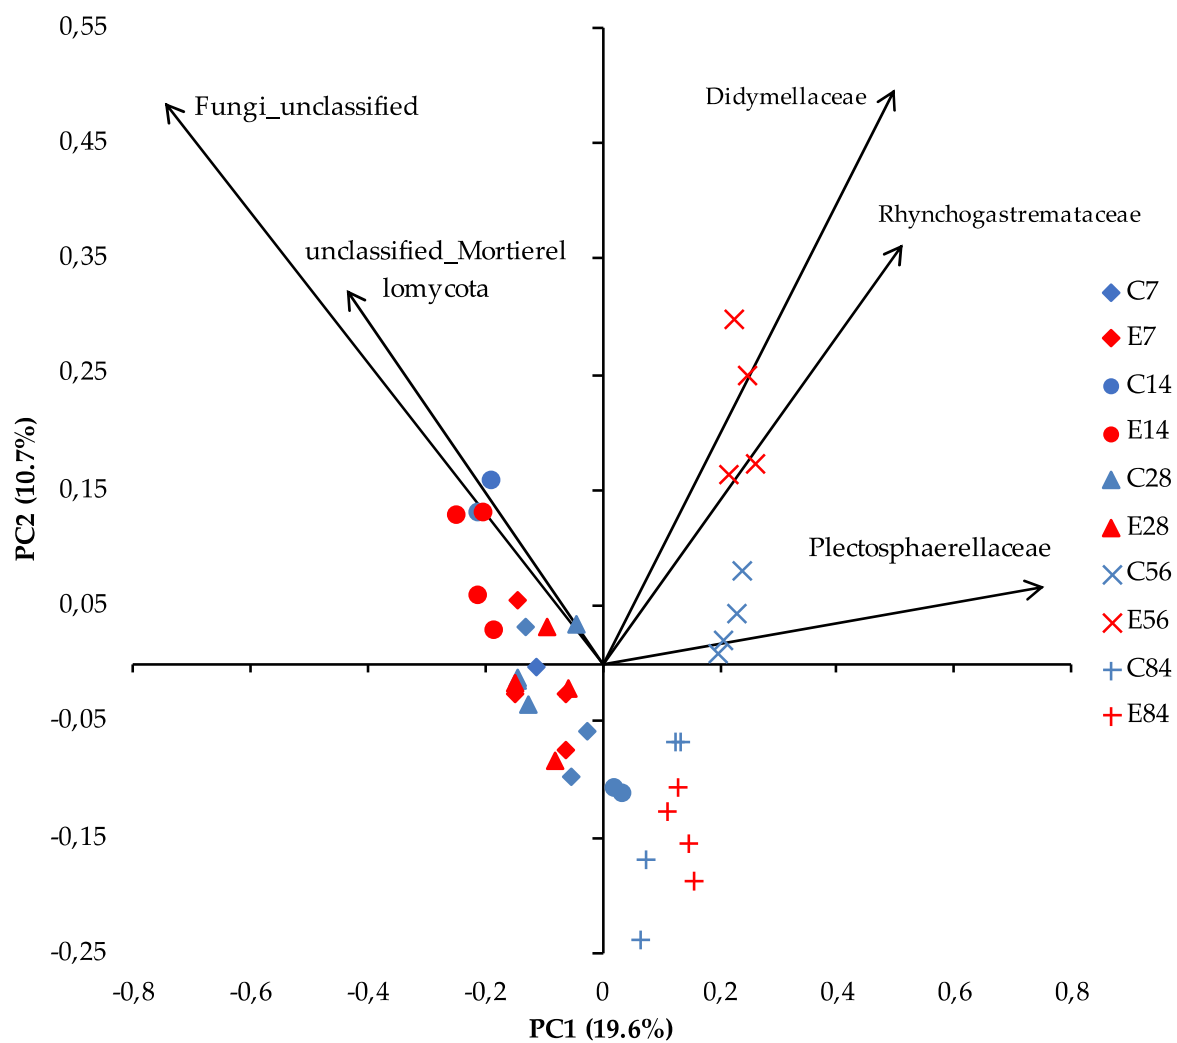

**Figure S5.** PCoA by UniFrac weighted distance matrix. Arrows indicate significant correlations at the family level

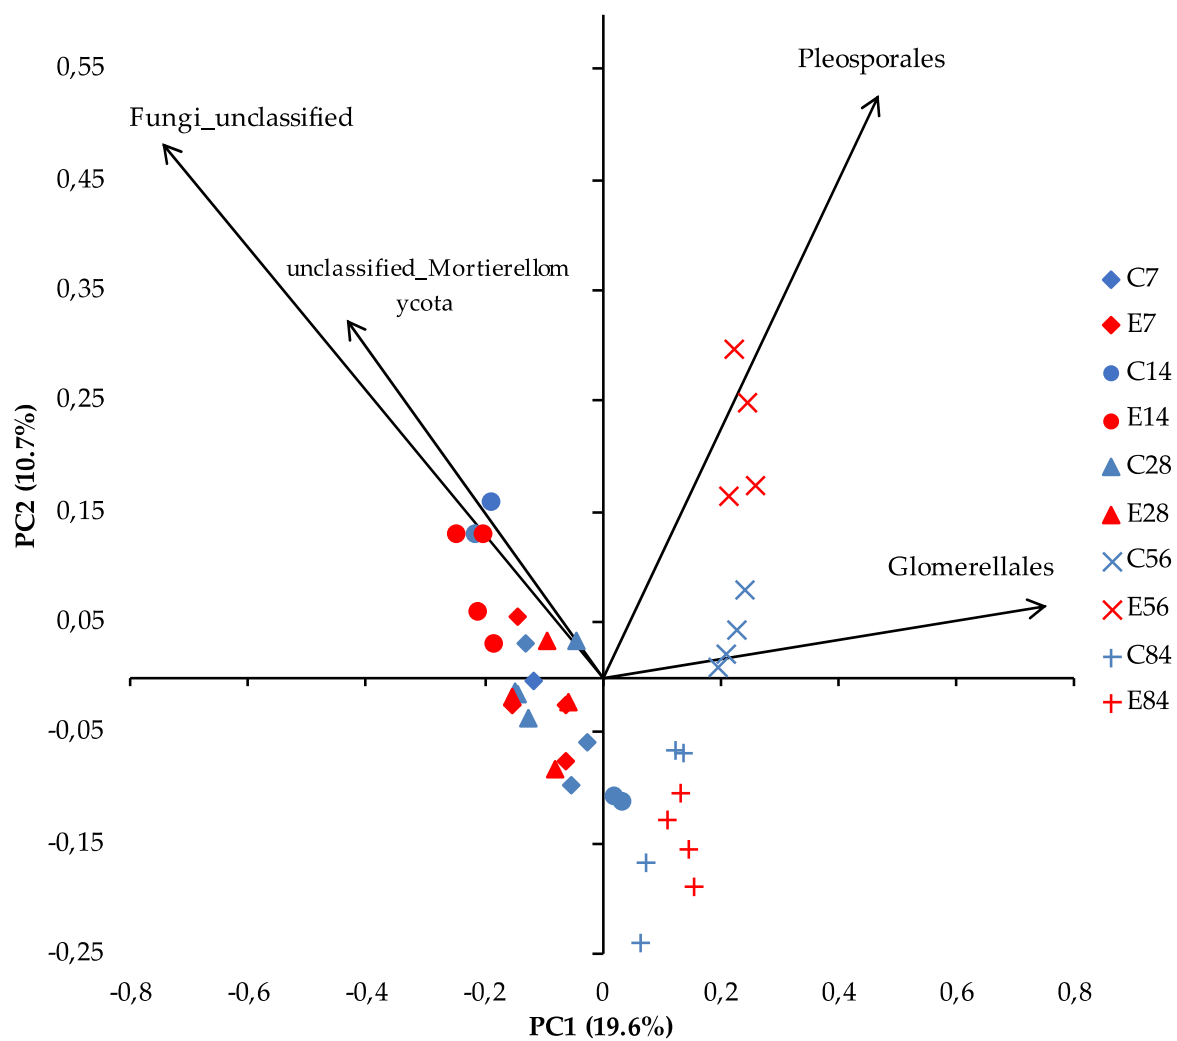

**Figure S6.** PCoA by UniFrac weighted distance matrix. Arrows indicate significant correlations at the level of orders

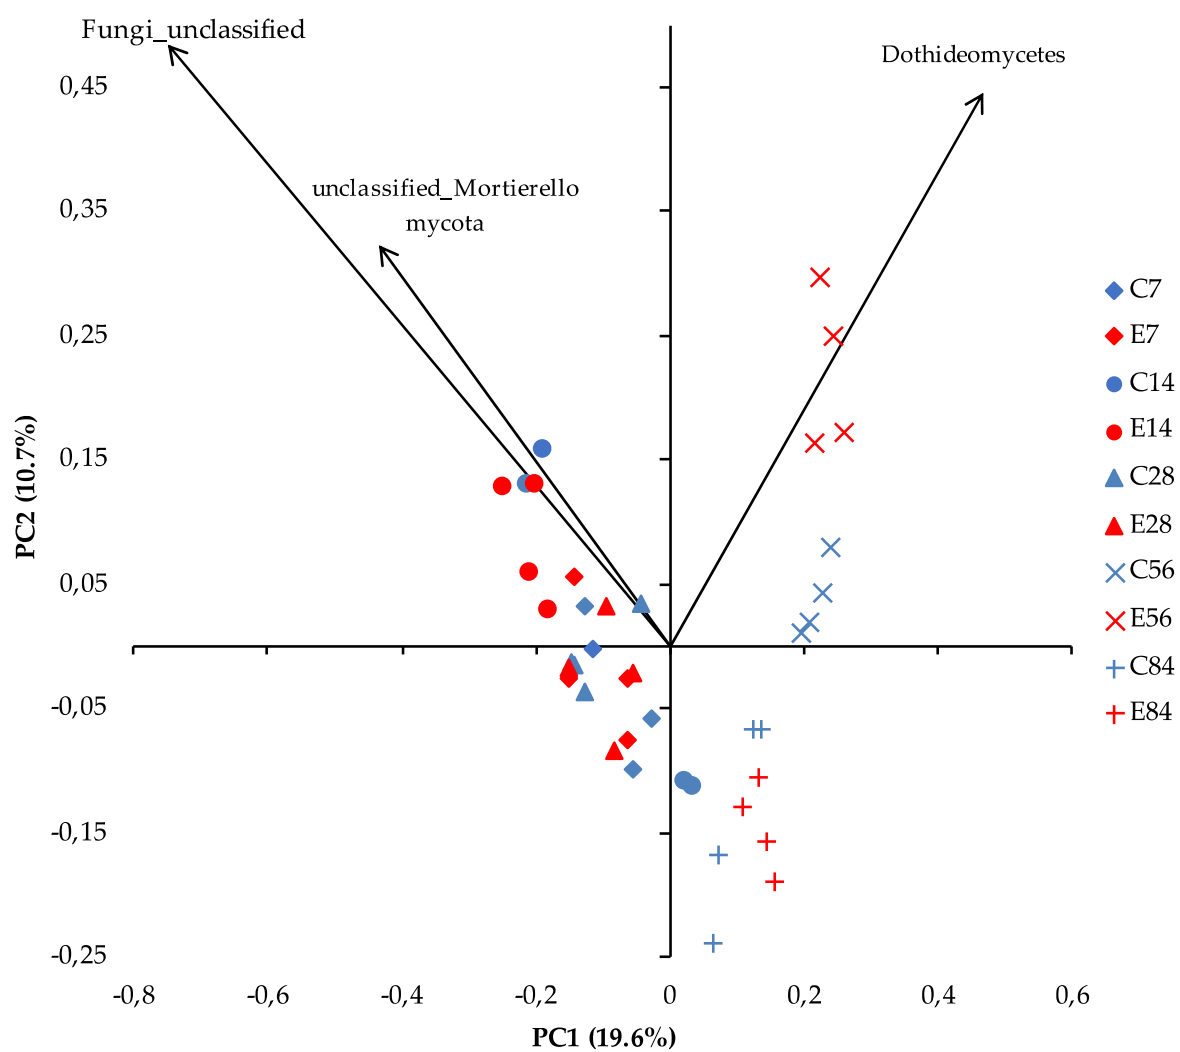

**Figure S7.** PCoA by UniFrac weighted distance matrix. Arrows indicate significant correlations at the class level



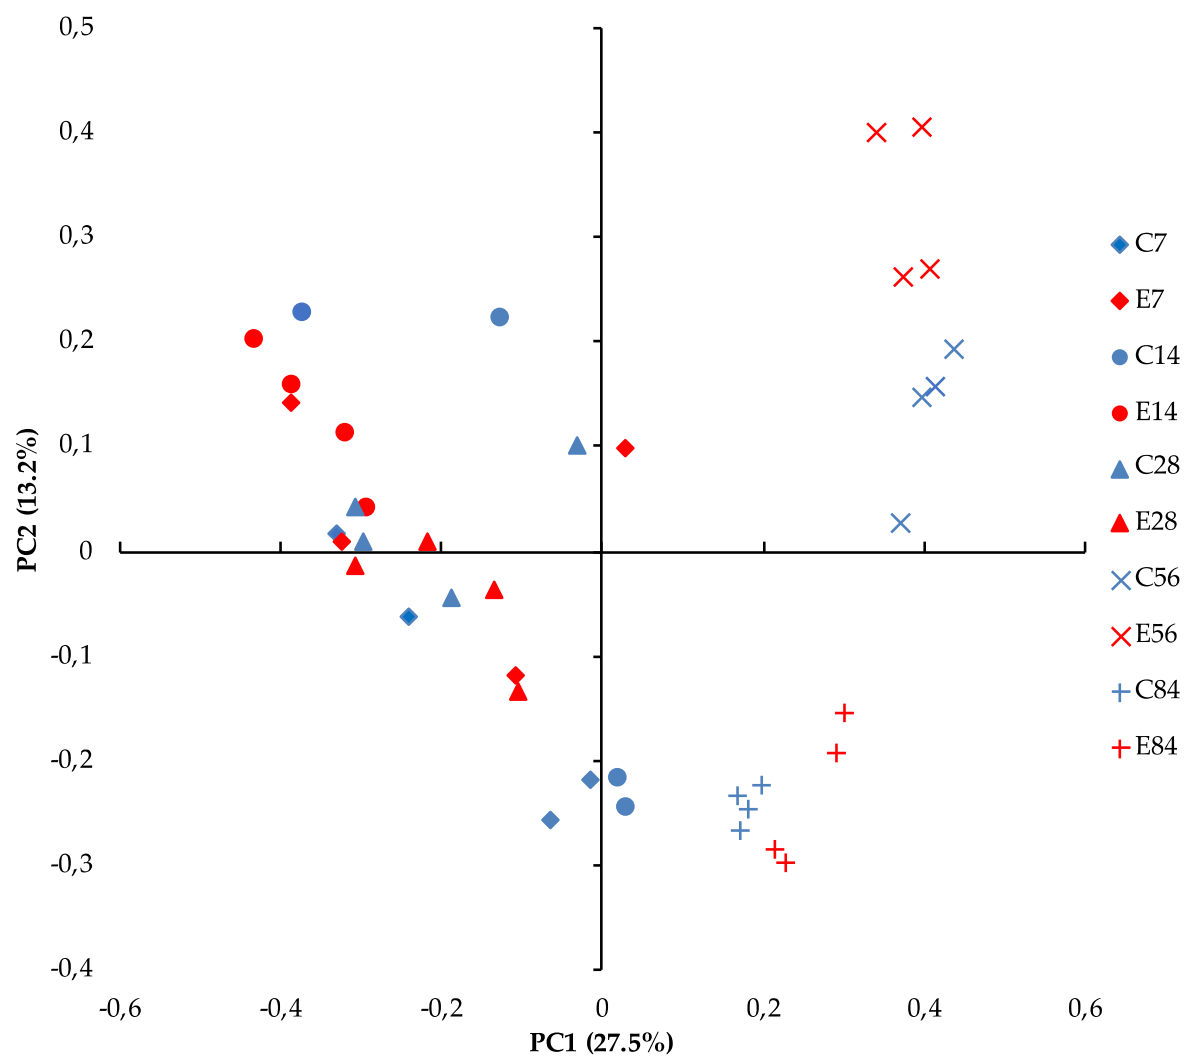

**Figure S8.** PCoA based on the Yue & Clayton measure of dissimilarity matrix (community structure at the OTU level).

**Table S2.** AMOVA analysis of fungal communities.

| Groups  | Source of variation | SS       | df | MS       | Fs      | p-value       |
|---------|---------------------|----------|----|----------|---------|---------------|
| C7-E7   | Among groups        | 0,324137 | 1  | 0,324137 | 2,16139 | <b>0,0589</b> |
|         | Within groups       | 0,899802 | 6  | 0,149967 |         |               |
| C84-E84 | Among groups        | 0,319236 | 1  | 0,319236 | 2,56815 | 0,0302        |
|         | Within groups       | 0,745835 | 6  | 0,124306 |         |               |
| C7-C84  | Among groups        | 0,574142 | 1  | 0,574142 | 4,92526 | 0,0301        |
|         | Within groups       | 0,699426 | 6  | 0,116571 |         |               |
| E7-E84  | Among groups        | 0,74092  | 1  | 0,74092  | 4,69823 | 0,0301        |
|         | Within groups       | 0,946211 | 6  | 0,157702 |         |               |
